# Supplementary material
Source: Springer Nature journal article supplement (https://www.springermedizin.de/resource/supplementary/13045_2011_171_MOESM6_ESM.pdf/9660806)

a.

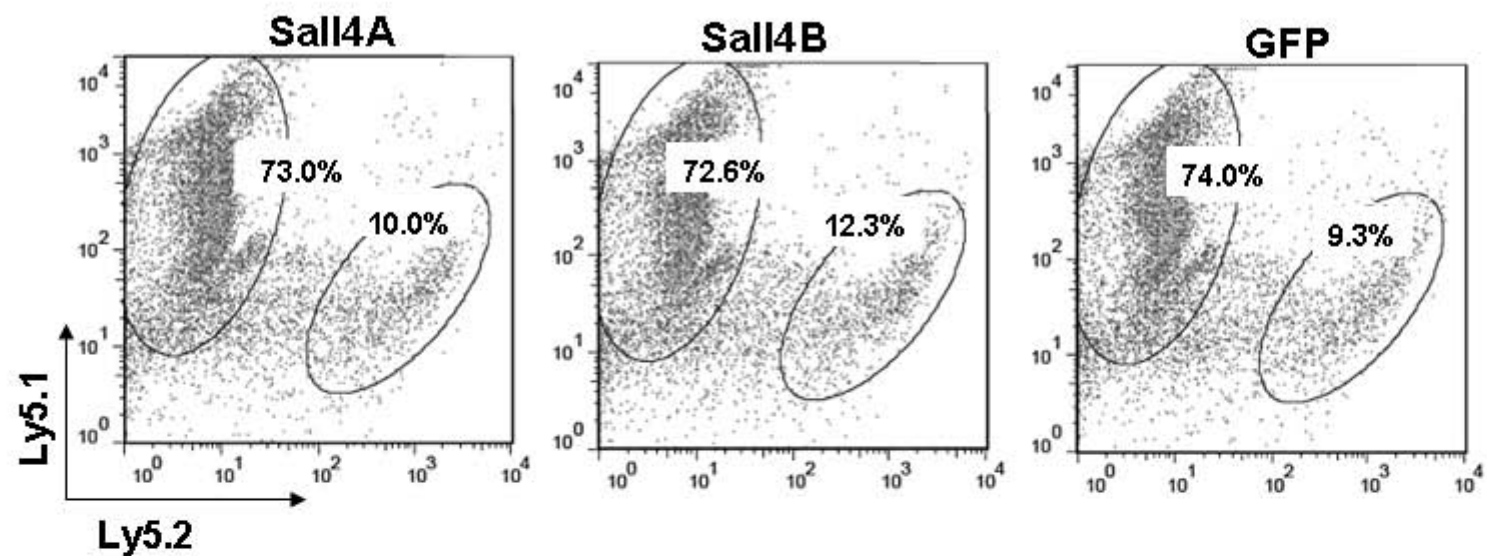

b.

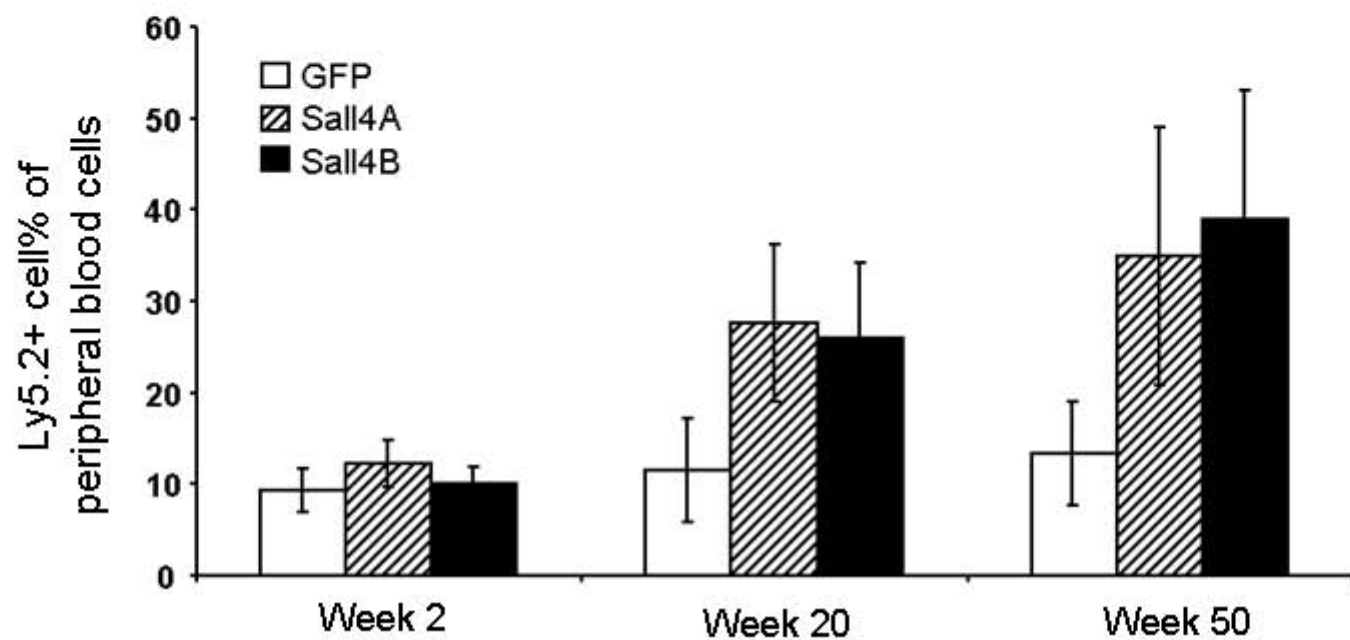

Supplement: MOESM6 [file 9660806]
